# Supplementary material
Source: Springer Nature journal article supplement (https://www.springermedizin.de/resource/supplementary/12913_2013_3425_MOESM1_ESM.pdf/9532774)
Supplement: MOESM1 [file 9532774]

Patients of Interdisciplinary Center for  
Vertigo and Balance Disorders

n= 453

Declined to participate (n=222)

- Declined to participate completely (n= 163)
- Filled the questionnaire for clinical use but declined to participate (n=59)

Included n = 231

Excluded from analyses (n= 28)

- Questionnaires not completed

Analysed n = 203
